# Supplementary material for: Single-cell multiomics of human fetal hematopoiesis define a developmental-specific population and a fetal signature
Source: PubMed Central journal article supplement — Blood Adv. 2023 Jun 30;7(18):5325–40. doi: 10.1182/bloodadvances.2023009808 (PMC10506049; doi:10.1182/bloodadvances.2023009808), 2023-06-30
Supplement: BLOODA_ADV-2023-009808-mmc1.pdf [file BLOODA_ADV-2023-009808-mmc1.pdf]

## SUPPLEMENTAL INFORMATION

### **SINGLE-CELL MULTIOMICS OF HUMAN FETAL HEMATOPOIESIS DEFINES A DEVELOPMENTAL SPECIFIC POPULATION AND A FETAL SIGNATURE**

Mikael N.E. Sommarin<sup>1</sup>, Rasmus Olofzon<sup>1</sup>, Sara Palo<sup>1</sup>, Parashar Dhapola<sup>1</sup>, Shamit Soneji<sup>1</sup>  
Göran Karlsson<sup>1\*</sup> and Charlotta Böiers<sup>1\*</sup>

<sup>1</sup>Division of Molecular Hematology, Department of Laboratory Medicine, Lund Stem Cell Center, Faculty of Medicine, Lund University, 221 84 Lund, Sweden

**\*Correspondence:**

Göran Karlsson email: [goran.karlsson@med.lu.se](mailto:goran.karlsson@med.lu.se)

Charlotta Böiers email: [charlotta.boiers@med.lu.se](mailto:charlotta.boiers@med.lu.se) (lead contact)

**Supplemental information contains:**

- Supplemental Figures 1–6
- Supplemental Tables 1–5

## SUPPLEMENTAL FIGURES

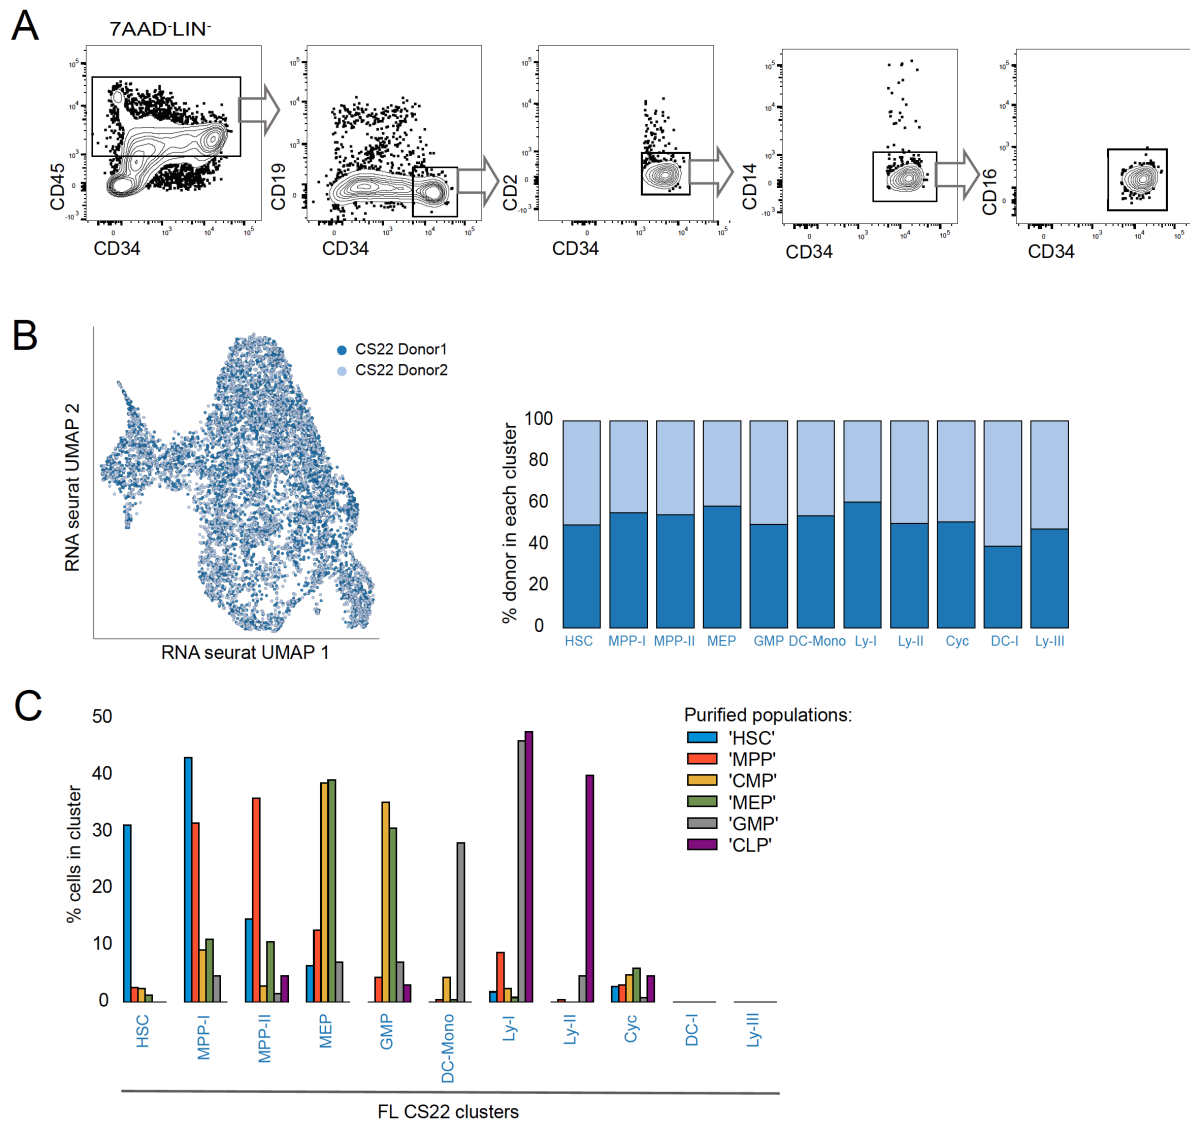

### Supplemental Figure 1

#### Individual donor contribution and verification of cluster identities

(A) Sorting strategy of CS22 LIN<sup>-</sup>CD45<sup>+</sup>CD34<sup>+</sup> FL cells. Viable cells (7-AAD<sup>-</sup>) were selected based on size (scatter) and gated negative for mature lineage markers (CD3, CD235a). Further gating is indicated in the figure. (B) UMAP of LIN<sup>-</sup>CD45<sup>+</sup>CD34<sup>+</sup> FL cells at CS22, as per donor (*left*) and bar plot of donor contribution per cluster (percent; *right*). (C) Immunophenotypic defined HSPCs from *Ranzoni et al* [12] were projected on the CS22 UMAP in *Figure 1B*. Distribution per cluster of each population is shown. In total 87-97% of the cells from the different populations mapped.

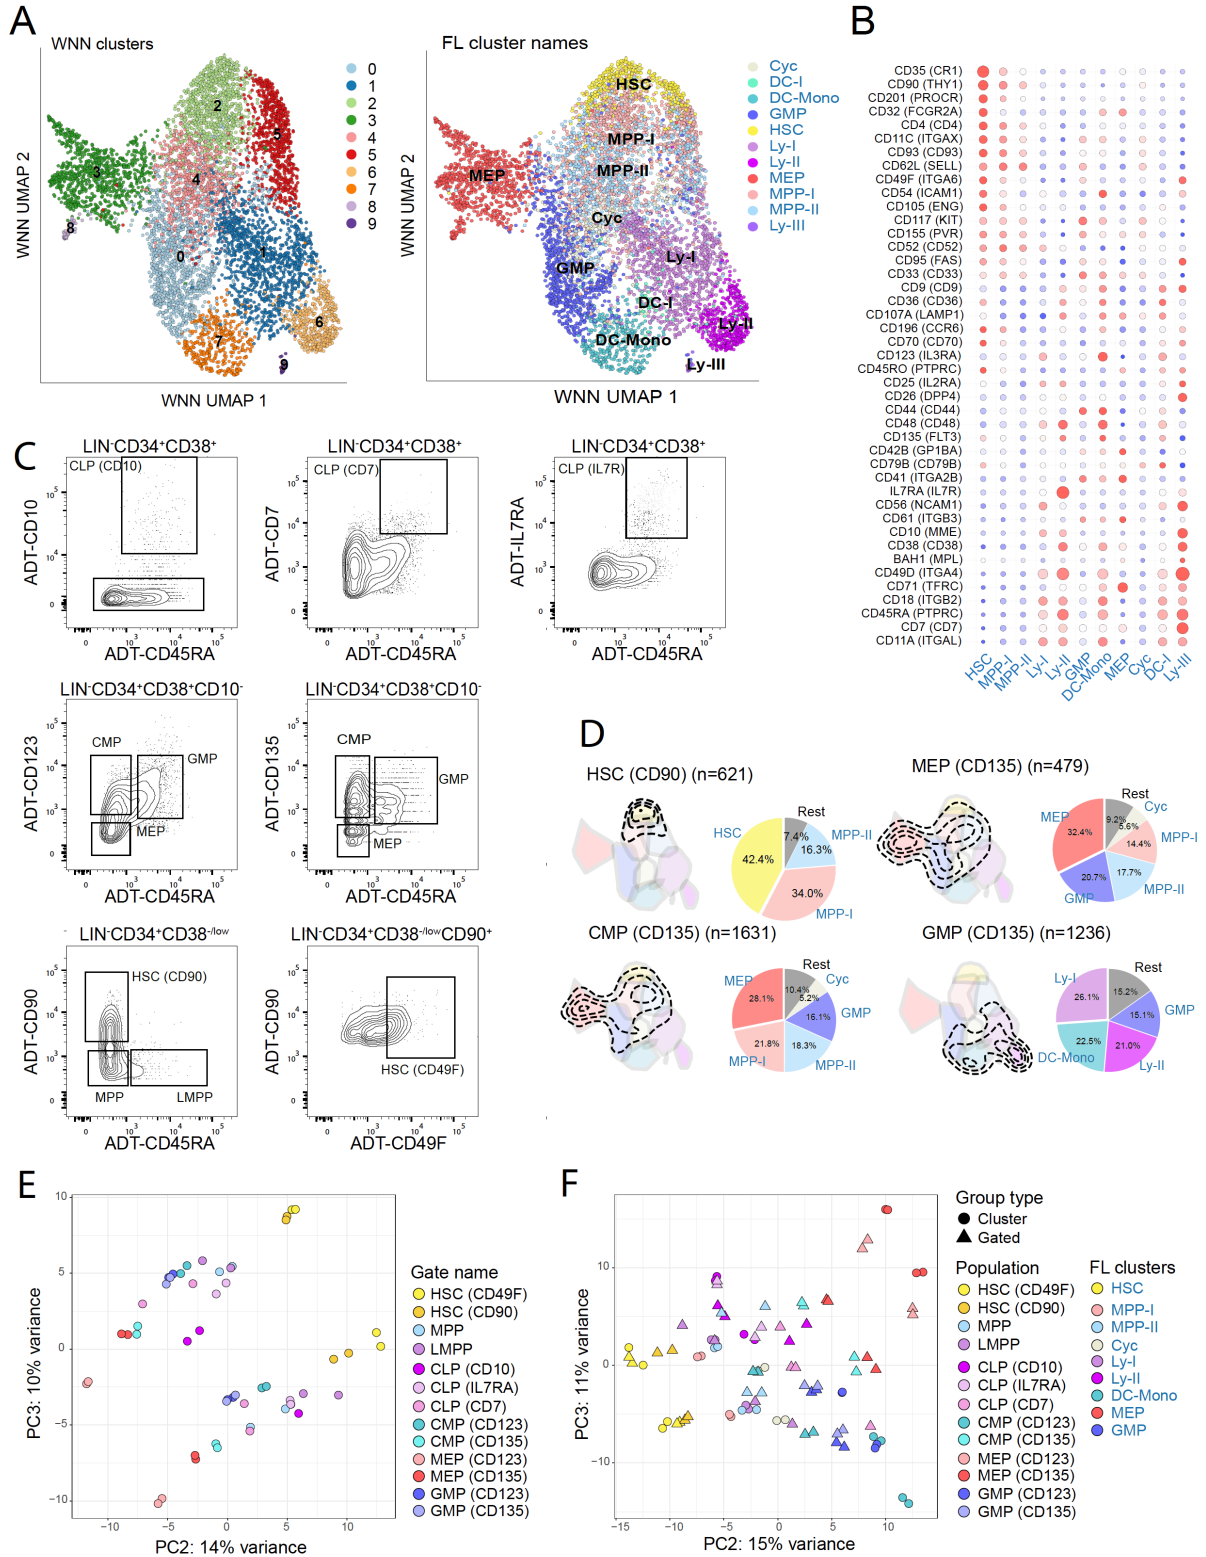

**Supplemental Figure 2**

**Integration of ADTs and transcriptome data and immunophenotypic gating strategy**

(A) The ADTs and the transcriptome data were integrated using WNN. UMAPs showing WNN clusters (*left*) and the FL clusters defined in *Figure 1B* (*right*). (B) Bead plot of z-scored ADT

expression values per cluster, where size of the circle represents fraction of cells with expression and the color correlates with expression level. (C) Gating of conventional immunophenotypic populations using ADT signals (cells were sorted LIN<sup>-</sup>CD45<sup>+</sup>CD34<sup>+</sup> as shown in *Supplemental Figure 1A*). Top row CLP gating, middle row myeloid progenitors (CMP, GMP, MEP) and bottom row primitive populations (HSC, MPP, LMPP). (D) Transcriptional cell states captured for each immunophenotypic gated population are shown within the contours on the FL CS22 UMAP. Pie charts show percentage of the different molecular clusters (as per *Figure 1B*) within each immunophenotypic gated progenitor. (E) PC2 vs PC3 of pseudo-bulked ADT gated cell populations using top 500 variably expressed genes (2 replicates/donor). (F) Combined PCA of pseudo-bulked ADT gated cell populations and clusters (defined in *Figure 1B*), top 500 variably expressed genes. PC2 vs PC3 is shown. (For immunophenotypic definition of populations see *Materials and Methods*.)

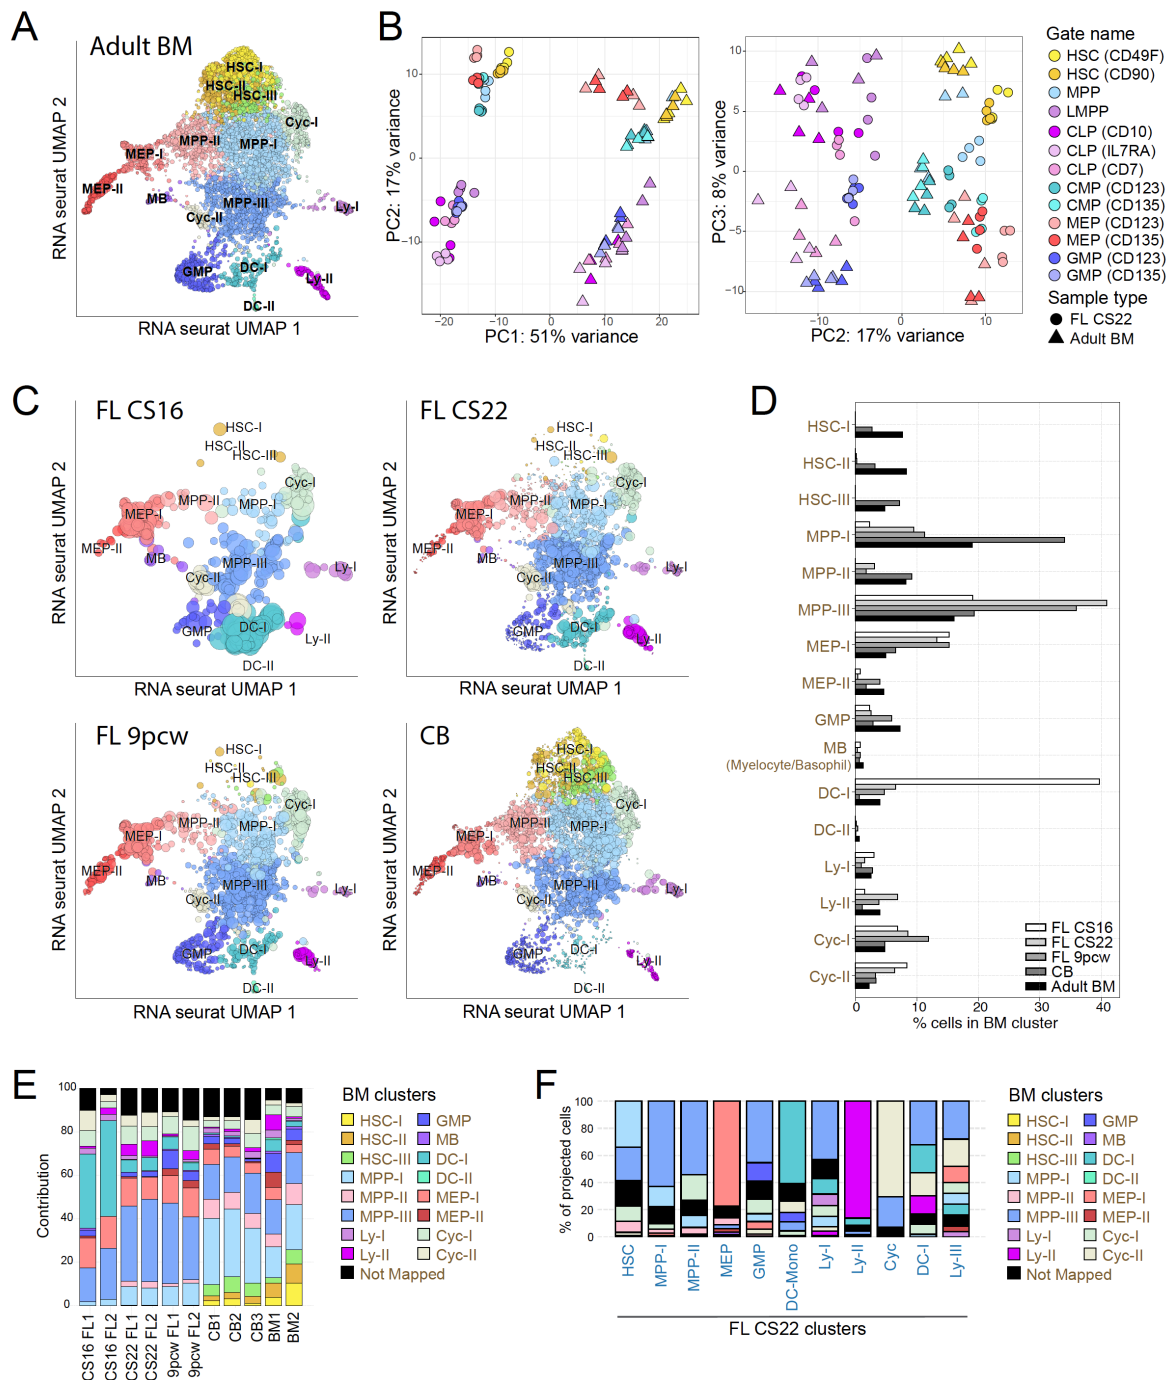

### Supplemental Figure 3

#### Projection of primitive FL and CB cells on adult BM reference

(A) UMAP of  $LIN^+CD34^+$  adult BM cells with cluster annotations from [19]. (B) PCA of pseudo-bulked immunophenotypic populations from FL CS22 and adult BM using 500 top variably expressed genes. PC1 vs PC2 (*left*) and PC2 vs PC3 (*right*). (C) Projection of FL CS16, FL CS22, FL 9 pcw and CB on the adult BM UMAP. Size of dots represents mapping-score

and color of dots represents BM clusters. (D) Quantification of projected cells (*Supplemental Figure 3C*) in all mapped developmental stages. (E) Contribution (percent) of individual donors to the mapping in *Supplemental Figure 3C-D*. (F) Classification of FL CS22 derived clusters (x-axis) on adult BM.

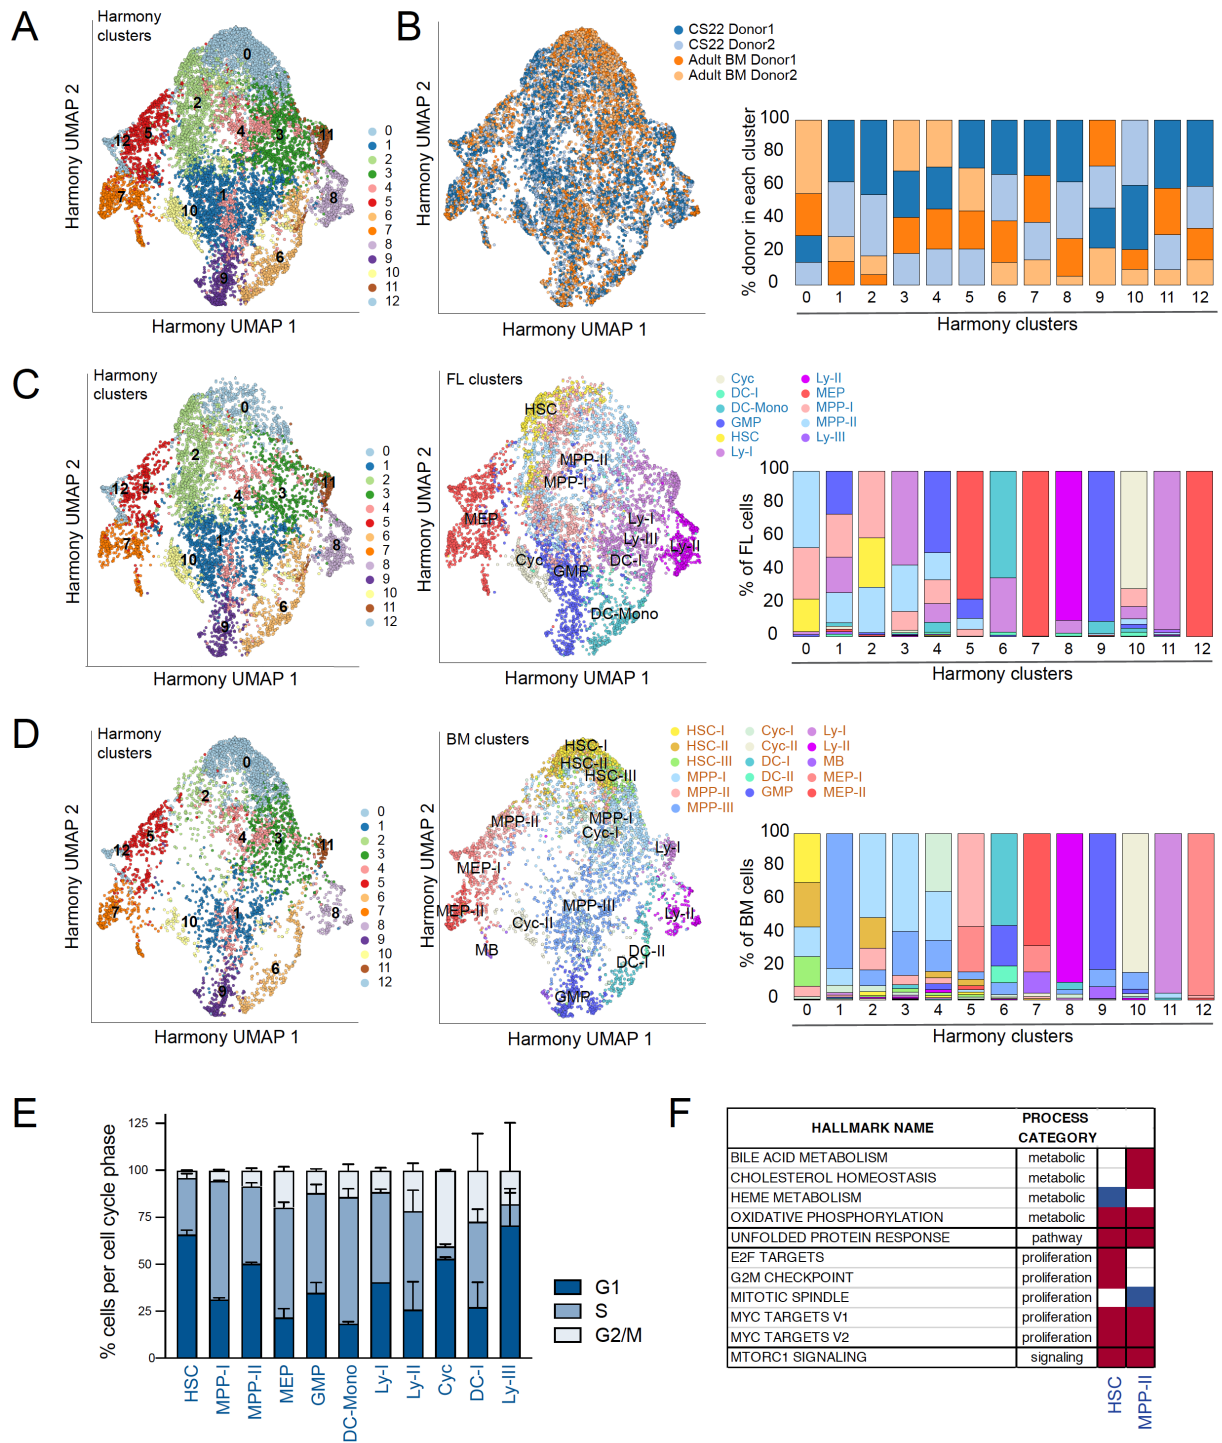

**Supplemental Figure 4**

**Integration of FL CS22 and adult BM transcriptome data**

(A) UMAP of cellular states after integration of FL CS22 and adult BM using Harmony. (B) Harmony UMAP of individual donors (*left*) and contribution of individual donors per cluster (percent, *right*). (C) Harmony UMAP displaying only the CS22 FL cells with Harmony clusters

(left) and FL clusters as per *Figure 1B (mid)*. Bar plot (*right*) shows distribution of FL clusters per Harmony cluster. (D) Harmony UMAP displaying only the adult BM cells with Harmony clusters (*left*) and BM clusters as per *Supplemental Figure 3A (mid)*. Bar plot (*right*) shows distribution of BM clusters per Harmony cluster. (E) Predicted cell cycle phase for each FL CS22 cluster. (F) GSEA of pseudo-bulked clusters comparing MPP-I to HSC and MPP-II respectively. Color code according to NES (Normalized Enrichment Score) value; red; upregulated and blue; downregulated in MPP-I. Selected gene sets with FDR q-value of <0.05 are shown.



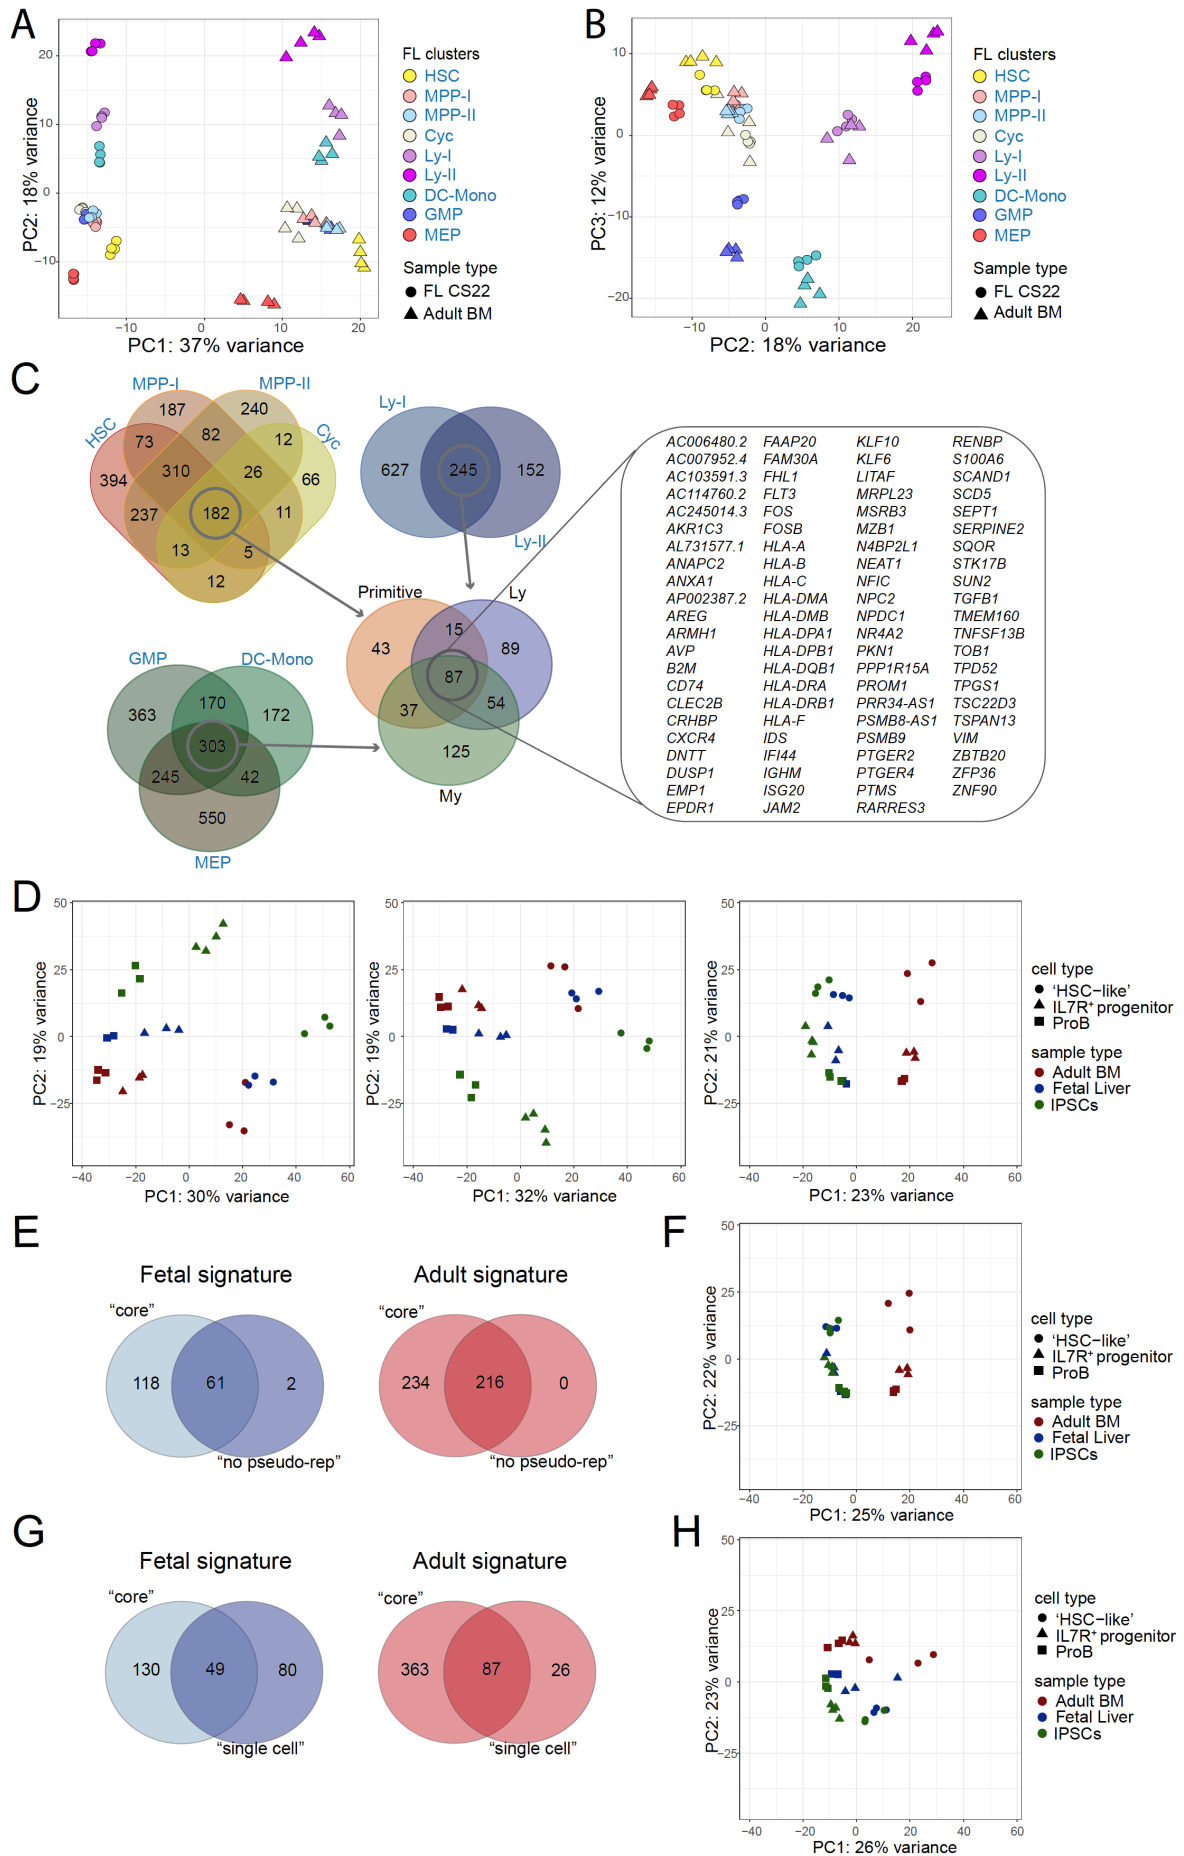

## Supplemental Figure 5

### Differential gene expression analysis comparing CS22 FL and adult BM counterparts

(A-B) PCA of pseudo-bulked clusters from FL CS22 and adult BM counterparts using 500 top variably expressed genes. Colors represent clusters and shapes represents sample type (*circle*: FL CS22 and *triangle*: adult BM). (A) PC1 vs PC2; (B) PC2 vs PC3. (C) Venn diagrams of downregulated genes in FL CS22 compared to adult BM counterparts defined by  $\log_2$  fold change  $< -1$  and adj. P value  $< 0.05$ . (D) Validation of the *fetal core signature* using data set [15]. *Left*: PCA of 500 top variably expressed genes; *mid*: as left but eliminating *fetal core signature* genes; *right*: PCA of *fetal core signature* genes. (E) Venn diagrams showing overlap between *fetal core signature* and DEGs detected without pseudo-replicates. (F) PCA of gene set generated without pseudo-replicates using data set [15]. (G) Venn diagrams showing overlap between *fetal core signature* and DEGs detected using a single cell method ( $\log_2$  fold change  $< |0.5|$ ). (H) PCA of gene set generated with single cell method using data set [15].

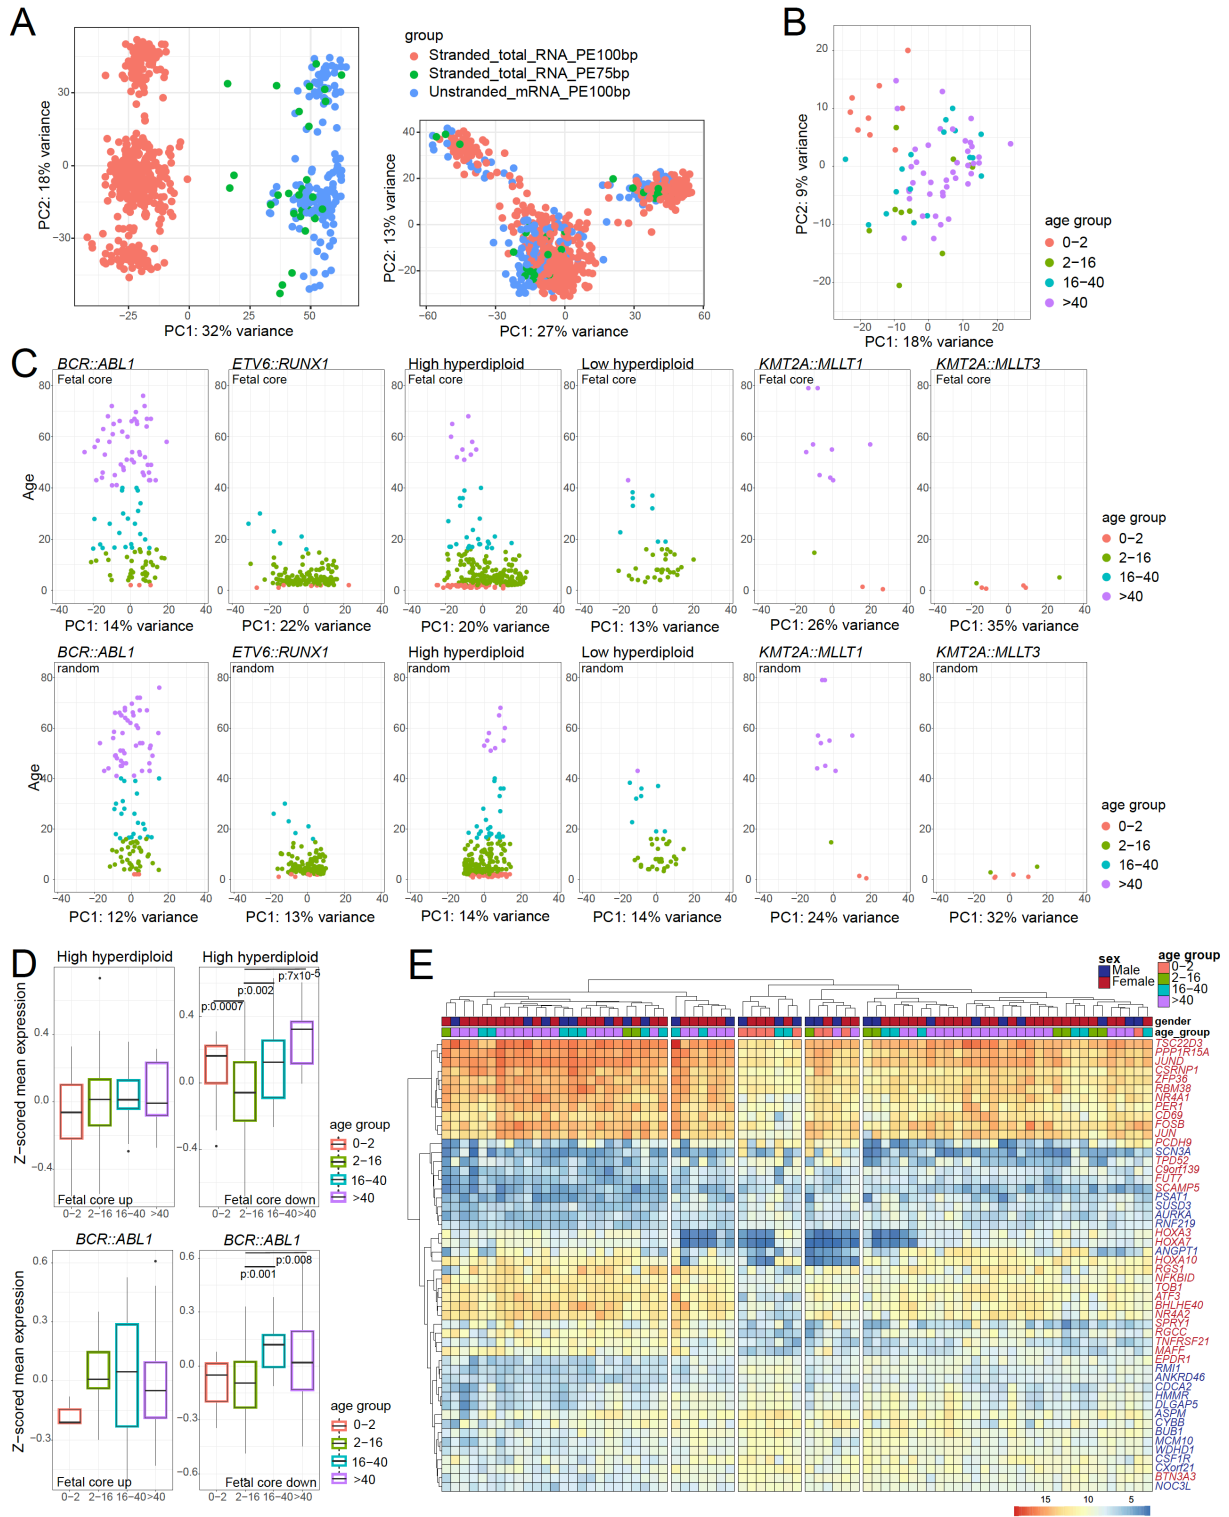

## Supplemental Figure 6

### Fetal core signature in B-ALL patient samples

(A) PCA of B-ALL samples [18] before batch correction (*left*) and after batch correction (*right*), of top 500 variably expressed genes. Color coded according to sequencing type. (B) PC1 vs PC2 of *KMT2A::AFF1* (*MLL::AF4*) B-ALL using the *fetal core signature*. Age group color

code is shown to the right. (C) PCA of individual leukemia sub-types using the *fetal core signature* (*top*) and representative PCA plot using random genes (*bottom*). PC1 vs age. (D) Box plots showing z-scored mean expression of the *fetal core signature* per age group. Up and down regulated gene sets are shown separately. High hyperdiploid (*top*), *BCR::ABL1* (*bottom*), adj. P values <0.05 indicated in the figure. The boxes include first to third quartile and the line indicates the median. (E) Heatmap of the genes marking the top 25 highest and 25 lowest values of PC1 in *KMT2A::AFF1* B-ALL. Samples were hierarchically clustered based on their gene expression. Top rows describe sex and age, and gene names are shown to the right (*blue label: fetal signature; red label: adult signature*).

***Supplemental Table 1: Samples included in the study.***

| <b>Sample</b>  | <b>Sex</b> | <b># Sorted cells</b> | <b># Cells pre-filtering</b> | <b># Cells used in analysis</b> |
|----------------|------------|-----------------------|------------------------------|---------------------------------|
| FL CS16 Donor1 | Female     | 906                   | 210                          | 109                             |
| FL CS16 Donor2 | Male       | 244                   | 63                           | 34                              |
| FL CS22 Donor1 | Female     | 10 000                | 4536                         | 3692                            |
| FL CS22 Donor2 | Male       | 10 000                | 3797                         | 3040                            |
| FL 9pcw Donor1 | Male       | 2 213                 | 458                          | 297                             |
| FL 9pcw Donor2 | Male       | 4 946                 | 1057                         | 842                             |

**Supplemental Table 2: CITE-seq antibodies used.**

| Reactivity | Surface marker | Product        | Clone    | Isotype  | Cat number | Lot     | Company   |
|------------|----------------|----------------|----------|----------|------------|---------|-----------|
| Anti human | CD38           | Totalseq-A0059 | HIT2     | mIgG1 k  | 94672      | B254149 | Biolegend |
| Anti human | CD90           | Totalseq-A0060 | 5E10     | mIgG1 k  | 94673      | B254151 | Biolegend |
| Anti human | CD117 (cKIT)   | Totalseq-A0061 | 104D2    | mIgG1 k  | 94674      | B254153 | Biolegend |
| Anti human | CD10           | Totalseq-A0062 | HI10a    | mIgG1 k  | 94675      | B254154 | Biolegend |
| Anti human | CD45RA         | Totalseq-A0063 | HI100    | mIgG2b k | 94676      | B254155 | Biolegend |
| Anti human | CD123          | Totalseq-A0064 | 6H6      | mIgG1 k  | 94677      | B254157 | Biolegend |
| Anti human | CD127 (IL7RA)  | Totalseq-A0065 | A019D5   | mIgG1 k  | 94678      | B254159 | Biolegend |
| Anti human | CD7            | Totalseq-A0066 | CD7-6B7  | mIgG2a k | 94679      | B254161 | Biolegend |
| Anti human | CD71           | Totalseq-A0067 | CY1G4    | mIgG2a k | 94680      | B254162 | Biolegend |
| Anti human | CD105          | Totalseq-A0068 | 43A3     | mIgG1 k  | 94681      | B254163 | Biolegend |
| Anti human | CD201 (EPCR)   | Totalseq-A0069 | RCR-401  | mIgG1 k  | 94682      | B254164 | Biolegend |
| Anti human | CD49f          | Totalseq-A0070 | GoH3     | rIgG2a k | 94683      | B254165 | Biolegend |
| Anti human | BAH1 (cMLP)    | Totalseq-A0071 | BAH1     | mIgG1 k  | 94684      | B254166 | Biolegend |
| Anti human | CD18           | Totalseq-A0385 | TSI/18   | mIgG1 k  | 302121     | B270525 | Biolegend |
| Anti human | CD25           | Totalseq-A0085 | BC96     | mIgG1 k  | 302643     | B271394 | Biolegend |
| Anti human | CD196          | Totalseq-A0143 | Go34E3   | mIgG2b k | 353437     | B270546 | Biolegend |
| Anti human | CD62L          | Totalseq-A0147 | DREG-56  | mIgG1 k  | 304847     | B272608 | Biolegend |
| Anti human | CD4            | Totalseq-A0072 | RPA-T4   | mIgG1 k  | 300563     | B268766 | Biolegend |
| Anti human | CD26           | Totalseq-A0396 | BA5b     | mIgG2a k | 302720     | B261042 | Biolegend |
| Anti human | CD32           | Totalseq-A0142 | FUN-2    | mIgG2b k | 303223     | B263613 | Biolegend |
| Anti human | CD42b          | Totalseq-A0216 | HIP1     | mIgG1 k  | 303937     | B271616 | Biolegend |
| Anti human | CD45RO         | Totalseq-A0087 | UCHL1    | mIgG1 k  | 304255     | B269954 | Biolegend |
| Anti human | CD9            | Totalseq-A0579 | H19a     | mIgG1 k  | 312119     | B271599 | Biolegend |
| Anti human | Integrin B7    | Totalseq-A0214 | FIB504   | rIgG2a k | 321227     | B269330 | Biolegend |
| Anti human | CD93           | Totalseq-A0446 | VIMD2    | mIgG1 k  | 336121     | B270926 | Biolegend |
| Anti human | CD61           | Totalseq-A0372 | VI-PL2   | mIgG1 k  | 336423     | B271605 | Biolegend |
| Anti human | CD95           | Totalseq-A0156 | DX2      | mIgG1 k  | 305649     | B269386 | Biolegend |
| Anti human | CD135          | Totalseq-A0351 | BV10A4H2 | mIgG1 k  | 313317     | B272437 | Biolegend |
| Anti human | CD11c          | Totalseq-A0053 | S-HCL-3  | mIgG2b k | 371519     | B270802 | Biolegend |
| Anti human | CD52           | Totalseq-A0033 | HI186    | mIgG2b k | 316017     | B260031 | Biolegend |

|            |           |                |            |          |        |         |           |
|------------|-----------|----------------|------------|----------|--------|---------|-----------|
| Anti human | CD36      | Totalseq-A0407 | 5-271      | mIgG2a k | 96419  | B267789 | Biolegend |
| Anti human | CD41      | Totalseq-A0353 | HIP8       | mIgG1 k  | 303737 | B271597 | Biolegend |
| Anti human | CD48      | Totalseq-A0029 | BJ40       | mIgG1 k  | 336709 | B260028 | Biolegend |
| Anti human | CD107A    | Totalseq-A0155 | H4A3       | mIgG1 k  | 328647 | B273007 | Biolegend |
| Anti human | CD35      | Totalseq-A0167 | E11        | mIgG1 k  | 333407 | B269337 | Biolegend |
| Anti human | CD155     | Totalseq-A0023 | SKIL4      | mIgG1 k  | 337623 | B269344 | Biolegend |
| Anti human | CD79b     | Totalseq-A0187 | CB3-1      | mIgG1 k  | 341415 | B270535 | Biolegend |
| Anti human | CD33      | Totalseq-A0052 | P97.6      | mIgG1 k  | 366629 | B259970 | Biolegend |
| Anti human | CD56      | Totalseq-A0084 | QA17A16    | mIgG1 k  | 392421 | B273249 | Biolegend |
| Anti human | CD44      | Totalseq-A0125 | BJ18       | mIgG1 k  | 338825 | B270931 | Biolegend |
| Anti human | CD11a     | Totalseq-A0185 | TS2/4      | mIgG1 k  | 350615 | B260299 | Biolegend |
| Anti human | CD54      | Totalseq-A0217 | HA58       | mIgG1 k  | 353123 | B269343 | Biolegend |
| Anti human | CD70      | Totalseq-A0027 | 113-16     | mIgG1 k  | 355117 | B263558 | Biolegend |
| Anti human | Hashtag 4 | Totalseq-A0254 | LNH-94/2M2 | mIgG1 k  | 394607 | B264726 | Biolegend |
| Anti human | Hashtag 5 | Totalseq-A0255 | LNH-94/2M2 | mIgG1 k  | 394609 | B264725 | Biolegend |
| Anti human | Hashtag 6 | Totalseq-A0256 | LNH-94/2M2 | mIgG1 k  | 394611 | B264724 | Biolegend |
| Anti human | Hashtag 7 | Totalseq-A0257 | LNH-94/2M2 | mIgG1 k  | 394613 | B264723 | Biolegend |
| Anti human | Hashtag 8 | Totalseq-A0258 | LNH-94/2M2 | mIgG1 k  | 394615 | B264722 | Biolegend |

**Supplemental Table 3: Contribution of individual donors (percent) to the gated populations (related to Figure 2C and Supplemental Figure 2D).**

| <b>Gated populations</b> | <b>CS22</b> |            |
|--------------------------|-------------|------------|
|                          | <b>FL1</b>  | <b>FL2</b> |
| HSC <sup>CD49F</sup>     | 17          | 83         |
| HSC <sup>CD90</sup>      | 44          | 56         |
| MPP                      | 40          | 60         |
| LMPP                     | 45          | 55         |
| CMP <sup>CD123</sup>     | 60          | 40         |
| CMP <sup>CD135</sup>     | 60          | 40         |
| GMP <sup>CD123</sup>     | 54          | 46         |
| GMP <sup>CD135</sup>     | 53          | 47         |
| MEP <sup>CD123</sup>     | 60          | 40         |
| MEP <sup>CD135</sup>     | 61          | 39         |
| CLP <sup>CD10</sup>      | 80          | 20         |
| CLP <sup>CD7</sup>       | 65          | 35         |
| CLP <sup>IL7R</sup>      | 55          | 45         |



**Supplemental Table 4: Fetal core signature upregulated genes (Fetal signature) (related to Figure 4D).**

| Fetal signature    |                   |                 |                 |                 |                |
|--------------------|-------------------|-----------------|-----------------|-----------------|----------------|
| Primitive clusters | Ly clusters       |                 | My clusters     |                 | All clusters   |
| <i>ANGPT1</i>      | <i>AASDHPPT</i>   | <i>KLHL9</i>    | <i>ALKBH1</i>   | <i>IGF2BP3</i>  | <i>ANGPT1</i>  |
| <i>ARID3A</i>      | <i>ACY3</i>       | <i>KNOP1</i>    | <i>ANGPT1</i>   | <i>IGFBP2</i>   | <i>CD7</i>     |
| <i>BAMBI</i>       | <i>ADGRG5</i>     | <i>KNSTRN</i>   | <i>ANKRD46</i>  | <i>IL6ST</i>    | <i>CHD7</i>    |
| <i>CALCRL</i>      | <i>AL590226.1</i> | <i>KPNA2</i>    | <i>ARID3B</i>   | <i>IPCEF1</i>   | <i>CRNDE</i>   |
| <i>CCT8</i>        | <i>ANGPT1</i>     | <i>LCK</i>      | <i>ASPM</i>     | <i>ITGA4</i>    | <i>CTHRC1</i>  |
| <i>CD200</i>       | <i>ANKRD46</i>    | <i>LIN28B</i>   | <i>AURKA</i>    | <i>KIF15</i>    | <i>DLK1</i>    |
| <i>CD7</i>         | <i>ARID3A</i>     | <i>LTB</i>      | <i>BACH1</i>    | <i>KIF2C</i>    | <i>FBLN1</i>   |
| <i>CHD7</i>        | <i>ASPM</i>       | <i>MAD2L1BP</i> | <i>BAMBI</i>    | <i>KNL1</i>     | <i>HSPA1A</i>  |
| <i>CLCN3</i>       | <i>BACH1</i>      | <i>MARCKS</i>   | <i>BLM</i>      | <i>KPNA2</i>    | <i>HSPA1B</i>  |
| <i>CRNDE</i>       | <i>BET1</i>       | <i>MARCKSL1</i> | <i>BUB1</i>     | <i>LAMC1</i>    | <i>HSPA6</i>   |
| <i>CSF1R</i>       | <i>BRCA2</i>      | <i>MED21</i>    | <i>BUB1B</i>    | <i>LDAH</i>     | <i>IGF2BP1</i> |
| <i>CTHRC1</i>      | <i>CD164</i>      | <i>MOB4</i>     | <i>CA8</i>      | <i>LEF1</i>     | <i>IGF2BP3</i> |
| <i>DLK1</i>        | <i>CD244</i>      | <i>MS4A1</i>    | <i>CACNA2D3</i> | <i>LIN28B</i>   | <i>ITGA4</i>   |
| <i>FAM43A</i>      | <i>CD3D</i>       | <i>MT2A</i>     | <i>CD200</i>    | <i>LTB</i>      | <i>LIN28B</i>  |
| <i>FBLN1</i>       | <i>CD7</i>        | <i>MTERF3</i>   | <i>CD300C</i>   | <i>MAPK6</i>    | <i>TPM2</i>    |
| <i>GNG11</i>       | <i>CDK1</i>       | <i>MYC</i>      | <i>CD7</i>      | <i>MARCKS</i>   |                |
| <i>GOLM1</i>       | <i>CHD7</i>       | <i>N4BP2</i>    | <i>CDCA2</i>    | <i>MCM10</i>    |                |
| <i>GSTM3</i>       | <i>COMMD10</i>    | <i>NOC3L</i>    | <i>CDCA8</i>    | <i>MDK</i>      |                |
| <i>GSTM5</i>       | <i>CRNDE</i>      | <i>NUP37</i>    | <i>CDK1</i>     | <i>MEG3</i>     |                |
| <i>HMGA2</i>       | <i>CTHRC1</i>     | <i>PDE3B</i>    | <i>CHD7</i>     | <i>MIR99AHG</i> |                |
| <i>HSPA1A</i>      | <i>CXORF21</i>    | <i>PPP1R14A</i> | <i>CHORDC1</i>  | <i>NCAPG</i>    |                |
| <i>HSPA1B</i>      | <i>CYBB</i>       | <i>PRKDC</i>    | <i>CIP2A</i>    | <i>PPAT</i>     |                |
| <i>HSPA6</i>       | <i>DICER1</i>     | <i>PSMB5</i>    | <i>CRNDE</i>    | <i>PPIL4</i>    |                |
| <i>IGF2BP1</i>     | <i>DLGAP5</i>     | <i>RBM7</i>     | <i>CTHRC1</i>   | <i>PRKCA</i>    |                |
| <i>IGF2BP3</i>     | <i>DLK1</i>       | <i>RIF1</i>     | <i>DHRS9</i>    | <i>PRSS21</i>   |                |
| <i>IGFBP2</i>      | <i>DNMT3B</i>     | <i>RIOK2</i>    | <i>DIAPH3</i>   | <i>PSAT1</i>    |                |
| <i>ITGA4</i>       | <i>EIF5A</i>      | <i>RM11</i>     | <i>DICER1</i>   | <i>PUDP</i>     |                |
| <i>KDM5B</i>       | <i>FAM110A</i>    | <i>RNF146</i>   | <i>DLAT</i>     | <i>PWWP2A</i>   |                |
| <i>LIN28B</i>      | <i>FBLN1</i>      | <i>RNF219</i>   | <i>DLK1</i>     | <i>QPRT</i>     |                |
| <i>MARCKSL1</i>    | <i>FBXO5</i>      | <i>RRAS2</i>    | <i>DNAJB1</i>   | <i>RAB7B</i>    |                |
| <i>MYCN</i>        | <i>FKBP4</i>      | <i>RSRC2</i>    | <i>DNMT3B</i>   | <i>RDX</i>      |                |
| <i>NEK6</i>        | <i>FSCN1</i>      | <i>SAMSN1</i>   | <i>DSCC1</i>    | <i>RNF146</i>   |                |
| <i>NRIP1</i>       | <i>GMNN</i>       | <i>SCN3A</i>    | <i>DTL</i>      | <i>RNF219</i>   |                |
| <i>RGS10</i>       | <i>GPR174</i>     | <i>SLC39A10</i> | <i>FBLN1</i>    | <i>RRM2</i>     |                |
| <i>SUPT16H</i>     | <i>HACD3</i>      | <i>SMARCAD1</i> | <i>FBLN2</i>    | <i>SMARCA1</i>  |                |
| <i>SUSD3</i>       | <i>HEMGN</i>      | <i>SS18</i>     | <i>FBXO17</i>   | <i>SMARCAD1</i> |                |

|             |                 |                |                  |               |  |
|-------------|-----------------|----------------|------------------|---------------|--|
| <i>TPM2</i> | <i>HIST1H1D</i> | <i>ST18</i>    | <i>FBXO5</i>     | <i>STIP1</i>  |  |
| <i>TRH</i>  | <i>HMGA1</i>    | <i>SUPT16H</i> | <i>GNG11</i>     | <i>SUSD3</i>  |  |
|             | <i>HMMR</i>     | <i>TAF2</i>    | <i>GNPDA1</i>    | <i>TPM2</i>   |  |
|             | <i>HSPA1A</i>   | <i>TESC</i>    | <i>GOLM1</i>     | <i>TRH</i>    |  |
|             | <i>HSPA1B</i>   | <i>TPM2</i>    | <i>GSTM3</i>     | <i>TRIP13</i> |  |
|             | <i>HSPA6</i>    | <i>TPM4</i>    | <i>HACD3</i>     | <i>ZBTB16</i> |  |
|             | <i>HSPB1</i>    | <i>TRMT11</i>  | <i>HEATR1</i>    | <i>ZGRF1</i>  |  |
|             | <i>HSPD1</i>    | <i>WDHD1</i>   | <i>HIST1H1A</i>  |               |  |
|             | <i>HSPE1</i>    | <i>WDR43</i>   | <i>HIST1H1B</i>  |               |  |
|             | <i>HSPH1</i>    | <i>ZC3H8</i>   | <i>HIST1H1D</i>  |               |  |
|             | <i>IFI16</i>    | <i>ZNF217</i>  | <i>HIST1H2BH</i> |               |  |
|             | <i>IGF2BP1</i>  | <i>ZNF644</i>  | <i>HMGA1</i>     |               |  |
|             | <i>IGF2BP2</i>  |                | <i>HMGA2</i>     |               |  |
|             | <i>IGF2BP3</i>  |                | <i>HPGDS</i>     |               |  |
|             | <i>IPO7</i>     |                | <i>HSPA1A</i>    |               |  |
|             | <i>ITGA4</i>    |                | <i>HSPA1B</i>    |               |  |
|             | <i>ITM2A</i>    |                | <i>HSPA6</i>     |               |  |
|             | <i>KCNQ1OT1</i> |                | <i>HSPH1</i>     |               |  |
|             | <i>KDM5B</i>    |                | <i>IGF2BP1</i>   |               |  |

**Supplemental Table 5: Fetal core signature downregulated genes (Adult signature)(related to Supplemental Figure 5C).**

| Adult signature    |                  |                   |                  |                   |                 |                 |                   |
|--------------------|------------------|-------------------|------------------|-------------------|-----------------|-----------------|-------------------|
| Primitive clusters |                  | Ly clusters       |                  | My clusters       |                 |                 | All clusters      |
| <i>ABCA2</i>       | <i>PCDH9</i>     | <i>ABHD15</i>     | <i>KLF10</i>     | <i>A1BG</i>       | <i>GBP1</i>     | <i>RUNX2</i>    | <i>AC006480.2</i> |
| <i>AC002454.1</i>  | <i>PKN1</i>      | <i>ABTB1</i>      | <i>KLF13</i>     | <i>A1BG-AS1</i>   | <i>GBP2</i>     | <i>SI00A10</i>  | <i>AC007952.4</i> |
| <i>AC004130.1</i>  | <i>PPP1R15A</i>  | <i>AC004687.1</i> | <i>KLF4</i>      | <i>AC004069.1</i> | <i>GLI4</i>     | <i>SI00A6</i>   | <i>AC103591.3</i> |
| <i>AC006480.2</i>  | <i>PRKG2</i>     | <i>AC006480.2</i> | <i>KLF6</i>      | <i>AC004540.2</i> | <i>GOLGA8B</i>  | <i>SARM1</i>    | <i>AC114760.2</i> |
| <i>AC007952.4</i>  | <i>PRNP</i>      | <i>AC007952.4</i> | <i>KLF7</i>      | <i>AC004687.1</i> | <i>GSAP</i>     | <i>SCAND1</i>   | <i>AC245014.3</i> |
| <i>AC020916.1</i>  | <i>PROM1</i>     | <i>AC008429.1</i> | <i>L3MBTL4</i>   | <i>AC004865.2</i> | <i>HAGHL</i>    | <i>SCD5</i>     | <i>AKR1C3</i>     |
| <i>AC026369.3</i>  | <i>PRR34-AS1</i> | <i>AC016866.1</i> | <i>LINC00226</i> | <i>AC006480.2</i> | <i>HDAC5</i>    | <i>SEPT1</i>    | <i>AL731577.1</i> |
| <i>AC103591.3</i>  | <i>PSMB8-AS1</i> | <i>AC087239.1</i> | <i>LINC00623</i> | <i>AC007325.4</i> | <i>HLA-A</i>    | <i>SERPINB9</i> | <i>ANAPC2</i>     |
| <i>AC114760.2</i>  | <i>PSMB9</i>     | <i>AC103591.3</i> | <i>LINC01089</i> | <i>AC007952.4</i> | <i>HLA-B</i>    | <i>SERPINE2</i> | <i>ANXA1</i>      |
| <i>AC245014.3</i>  | <i>PTGER2</i>    | <i>AC114760.2</i> | <i>LITAF</i>     | <i>AC020916.1</i> | <i>HLA-C</i>    | <i>SH3D21</i>   | <i>AP002387.2</i> |
| <i>AKR1C3</i>      | <i>PTGER4</i>    | <i>AC245014.3</i> | <i>LPXN</i>      | <i>AC044849.1</i> | <i>HLA-DMA</i>  | <i>SH3PXD2A</i> | <i>AREG</i>       |
| <i>AL136454.1</i>  | <i>PTMS</i>      | <i>ACSL1</i>      | <i>LRRC26</i>    | <i>AC092069.1</i> | <i>HLA-DMB</i>  | <i>SLFN11</i>   | <i>ARMH1</i>      |
| <i>AL731577.1</i>  | <i>RARRES3</i>   | <i>ACSM3</i>      | <i>LRRK1</i>     | <i>AC103591.3</i> | <i>HLA-DPA1</i> | <i>SMIM3</i>    | <i>AVP</i>        |
| <i>ANAPC2</i>      | <i>RENBP</i>     | <i>ACTN1</i>      | <i>MAN1A1</i>    | <i>AC114760.2</i> | <i>HLA-DPB1</i> | <i>SMIM6</i>    | <i>B2M</i>        |
| <i>ANKRD28</i>     | <i>RIPOR2</i>    | <i>AHNAK</i>      | <i>MAP2K2</i>    | <i>AC133919.1</i> | <i>HLA-DQB1</i> | <i>SMKR1</i>    | <i>CD74</i>       |
| <i>ANXA1</i>       | <i>RNF24</i>     | <i>AJ009632.2</i> | <i>MAP7</i>      | <i>AC245014.3</i> | <i>HLA-DRA</i>  | <i>SOCS3</i>    | <i>CLEC2B</i>     |
| <i>AP002387.2</i>  | <i>SI00A11</i>   | <i>AKR1C3</i>     | <i>MCUB</i>      | <i>AC245297.3</i> | <i>HLA-DRB1</i> | <i>SPATC1L</i>  | <i>CRHBP</i>      |
| <i>AREG</i>        | <i>SI00A6</i>    | <i>AL355075.4</i> | <i>MFSD6</i>     | <i>ACTL10</i>     | <i>HLA-F</i>    | <i>SPRY1</i>    | <i>CXCR4</i>      |
| <i>ARMH1</i>       | <i>SCAMP5</i>    | <i>AL592183.1</i> | <i>MIB2</i>      | <i>ACTN1</i>      | <i>HOTAIRM1</i> | <i>SQOR</i>     | <i>DNTT</i>       |
| <i>ATF3</i>        | <i>SCAND1</i>    | <i>AL731577.1</i> | <i>MILR1</i>     | <i>ADARB1</i>     | <i>HOXA10</i>   | <i>SRGN</i>     | <i>DUSP1</i>      |
| <i>ATP1B1</i>      | <i>SCD5</i>      | <i>ALDH1A1</i>    | <i>MME</i>       | <i>ADGRG6</i>     | <i>HOXA3</i>    | <i>SRSF5</i>    | <i>EMP1</i>       |
| <i>ATP2B1-AS1</i>  | <i>SCN9A</i>     | <i>ANAPC2</i>     | <i>MRPL23</i>    | <i>AHNAK</i>      | <i>HOXA7</i>    | <i>STAT4</i>    | <i>EPDR1</i>      |
| <i>AVP</i>         | <i>SDK2</i>      | <i>ANXA1</i>      | <i>MSRB3</i>     | <i>AIG1</i>       | <i>HSBP1L1</i>  | <i>STK17B</i>   | <i>FAAP20</i>     |
| <i>B2M</i>         | <i>SEPT1</i>     | <i>ANXA2</i>      | <i>MT-ND3</i>    | <i>AKR1C3</i>     | <i>IDS</i>      | <i>SUN2</i>     | <i>FAM30A</i>     |
| <i>BTG2</i>        | <i>SERPINE2</i>  | <i>AP001453.2</i> | <i>MXD4</i>      | <i>AL121944.1</i> | <i>IFI27L2</i>  | <i>SYNE3</i>    | <i>FHL1</i>       |
| <i>C16ORF54</i>    | <i>SLC39A3</i>   | <i>AP002387.2</i> | <i>MYLK</i>      | <i>AL136454.1</i> | <i>IFI44</i>    | <i>TAP1</i>     | <i>FLT3</i>       |
| <i>C1ORF21</i>     | <i>SLC40A1</i>   | <i>AREG</i>       | <i>MZB1</i>      | <i>AL355075.4</i> | <i>IGHM</i>     | <i>TCF7</i>     | <i>FOS</i>        |
| <i>C22ORF34</i>    | <i>SMIM6</i>     | <i>ARHGAP45</i>   | <i>N4BP2L1</i>   | <i>AL731577.1</i> | <i>IGSF10</i>   | <i>TGFB1</i>    | <i>FOSB</i>       |
| <i>C3ORF80</i>     | <i>SOCS2</i>     | <i>ARL4C</i>      | <i>NBEAL1</i>    | <i>ALDH1A1</i>    | <i>IL17RC</i>   | <i>TMEM102</i>  | <i>HLA-A</i>      |
| <i>C9ORF139</i>    | <i>SOCS3</i>     | <i>ARMH1</i>      | <i>NEAT1</i>     | <i>ALDH2</i>      | <i>IL18</i>     | <i>TMEM107</i>  | <i>HLA-B</i>      |
| <i>CARD16</i>      | <i>SOD2 1</i>    | <i>ASB13</i>      | <i>NEGR1</i>     | <i>ANAPC2</i>     | <i>ISG20</i>    | <i>TMEM14A</i>  | <i>HLA-C</i>      |
| <i>CAT</i>         | <i>SPARC</i>     | <i>ATP10D</i>     | <i>NFIC</i>      | <i>ANKH</i>       | <i>JAKMIP2</i>  | <i>TMEM160</i>  | <i>HLA-DMA</i>    |
| <i>CAVIN1</i>      | <i>SPNS3</i>     | <i>ATP6V0E2</i>   | <i>NFKBID</i>    | <i>ANKRD28</i>    | <i>JAM2</i>     | <i>TNFRSF14</i> | <i>HLA-DMB</i>    |
| <i>CBX6</i>        | <i>SPPL2B</i>    | <i>AVP</i>        | <i>NPC2</i>      | <i>ANXA1</i>      | <i>JUND</i>     | <i>TNFSF13B</i> | <i>HLA-DPA1</i>   |
| <i>CD69</i>        | <i>SQOR</i>      | <i>B2M</i>        | <i>NPDC1</i>     | <i>ANXA2</i>      | <i>KLF10</i>    | <i>TNNT3</i>    | <i>HLA-DPB1</i>   |
| <i>CD74</i>        | <i>STK17B</i>    | <i>BAD</i>        | <i>NR1H2</i>     | <i>ANXA2R</i>     | <i>KLF13</i>    | <i>TOB1</i>     | <i>HLA-DQB1</i>   |

|          |          |          |           |            |           |          |           |
|----------|----------|----------|-----------|------------|-----------|----------|-----------|
| CD9      | SUN2     | BLNK     | NR4A2     | AP002387.2 | KLF2      | TPD52    | HLA-DRA   |
| CDCP1    | TGFB1    | BLVRA    | OPTN      | AP002748.3 | KLF4      | TPGS1    | HLA-DRB1  |
| CEBPA    | TMEM160  | BSPRY    | PARP10    | AREG       | KLF6      | TRADD    | HLA-F     |
| CLEC2B   | TMEM246  | BST1     | PBXIP1    | ARL4A      | KLF9      | TRBC2    | IDS       |
| CLEC9A   | TNFAIP3  | BTG2     | PDE4B     | ARMH1      | KRT18     | TRIM47   | IFI44     |
| CLIC2    | TNFRSF14 | C16ORF86 | PHACTR1   | ASB13      | L3MBTL4   | TSC22D3  | IGHM      |
| CRHBP    | TNFSF13B | C1ORF162 | PKN1      | ATL1       | LGALS3BP  | TSPAN13  | ISG20     |
| CTSW     | TOB1     | C1QTNF4  | PLK2      | ATP10D     | LHFPL6    | TSTD1    | JAM2      |
| CXCR4    | TPD52    | CAPN2    | PNRC1     | ATP2B1-AS1 | LINC00623 | TTC32    | KLF10     |
| DNTT     | TPGS1    | CAST     | PPP1R14B  | AVP        | LINC01637 | VAMP2    | KLF6      |
| DUSP1    | TRBC2    | CAVIN2   | PPP1R15A  | AZU1       | LINC02256 | VIM      | LITAF     |
| EMP1     | TSC22D3  | CBR3     | PRKCH     | B2M        | LINC02573 | WAC-AS1  | MRPL23    |
| EMP3     | TSPAN13  | CCND3    | PROM1     | BCAS4      | LITAF     | WDR49    | MSRB3     |
| EPDR1    | TSPO     | CCZ1B    | PRR34-AS1 | BEX5       | LRCH4     | Z93241.1 | MZB1      |
| EREG     | TSTD1    | CD69     | PSMB8-AS1 | BHLHE40    | LRRC26    | ZBTB20   | N4BP2L1   |
| FAAP20   | TUBA1A   | CD74     | PSMB9     | BLVRA      | LRRK1     | ZC3HAV1  | NEAT1     |
| FAM30A   | VIM      | CD9      | PTGER2    | BSPRY      | LTBP3     | ZDHHC2   | NFIC      |
| FCER1A   | YBX3     | CDKN2D   | PTGER4    | BST2       | LTC4S     | ZFP36    | NPC2      |
| FHL1     | ZBTB20   | CIITA    | PTMS      | BTN3A3     | MAFF      | ZNF385C  | NPDC1     |
| FLT3     | ZBTB7A   | CLEC2B   | RABL6     | C16ORF45   | MAP3K8    | ZNF395   | NR4A2     |
| FOS      | ZDHHC2   | CLIP4    | RARRES3   | C16ORF54   | MAP7      | ZNF90    | PKN1      |
| FOSB     | ZFP36    | CLN8     | RBM38     | C1ORF21    | MARCH9    |          | PPP1R15A  |
| FUT7     | ZNF90    | COBL     | REL       | C1QTNF4    | MCL1      |          | PROM1     |
| GUCY1B1  |          | CPT1A    | RENBP     | C21ORF2    | MCUB      |          | PRR34-AS1 |
| HLA-A    |          | CRHBP    | REPIN1    | C22ORF34   | MED17     |          | PSMB8-AS1 |
| HLA-B    |          | CRTAP    | RETREG1   | C3ORF80    | MESP1     |          | PSMB9     |
| HLA-C    |          | CSRNP1   | RETREG2   | C9ORF139   | METTL7A   |          | PTGER2    |
| HLA-DMA  |          | CXCR4    | RGS1      | C9ORF43    | MFSD6     |          | PTGER4    |
| HLA-DMB  |          | DACH1    | RGS2      | CARMIL2    | MGLL      |          | PTMS      |
| HLA-DPA1 |          | DDIT4    | RHPN1     | CAST       | MIF       |          | RARRES3   |
| HLA-DPB1 |          | DNTT     | RIPOR1    | CAT        | MLXIP     |          | RENBP     |
| HLA-DQA1 |          | DUOX1    | RNF43     | CAVIN1     | MRPL23    |          | S100A6    |
| HLA-DQB1 |          | DUSP1    | RUBCN     | CBR1       | MSRB3     |          | SCAND1    |
| HLA-DRA  |          | EAF2     | RUBCNL    | CBR3       | MT-ND1    |          | SCD5      |
| HLA-DRB1 |          | EIF4E3   | RUNX2     | CCDC57     | MT-ND3    |          | SEPT1     |
| HLA-F    |          | EMP1     | S100A10   | CCL28      | MT1F      |          | SERPINE2  |
| ID2      |          | ENTPD6   | S100A11   | CD151      | MTURN     |          | SQOR      |
| IDS      |          | EPDR1    | S100A6    | CD300LF    | MVP       |          | STK17B    |
| IER2     |          | FAAP20   | SCAND1    | CD38       | MYCT1     |          | SUN2      |
| IFI27L2  |          | FAM215B  | SCD5      | CD59       | MYO1G     |          | TGFB1     |
| IFI44    |          | FAM30A   | SCHIP1    | CD74       | MZB1      |          | TMEM160   |
| IFI6     |          | FBXW5    | SDK2      | CDCP1      | N4BP2L1   |          | TNFSF13B  |

|                  |  |                 |                 |                |                  |  |                |
|------------------|--|-----------------|-----------------|----------------|------------------|--|----------------|
| <i>IGFBP7</i>    |  | <i>FCMR</i>     | <i>SEPT1</i>    | <i>CDK14</i>   | <i>NAALADL1</i>  |  | <i>TOB1</i>    |
| <i>IGHM</i>      |  | <i>FHL1</i>     | <i>SERPINB9</i> | <i>CDKN2C</i>  | <i>NBEAL1</i>    |  | <i>TPD52</i>   |
| <i>IL18</i>      |  | <i>FKBP5</i>    | <i>SERPINE2</i> | <i>CHST2</i>   | <i>NDRG1</i>     |  | <i>TPGS1</i>   |
| <i>IMPA2</i>     |  | <i>FLOT1</i>    | <i>SMIM3</i>    | <i>CIITA</i>   | <i>NEAT1</i>     |  | <i>TSC22D3</i> |
| <i>IRF2BP2</i>   |  | <i>FLT3</i>     | <i>SOD2 1</i>   | <i>CITED4</i>  | <i>NECTIN1</i>   |  | <i>TSPAN13</i> |
| <i>ISG20</i>     |  | <i>FOS</i>      | <i>SPARC</i>    | <i>CLEC12A</i> | <i>NFIA</i>      |  | <i>VIM</i>     |
| <i>JAM2</i>      |  | <i>FOSB</i>     | <i>SPATC1L</i>  | <i>CLEC2B</i>  | <i>NFIC</i>      |  | <i>ZBTB20</i>  |
| <i>JUN</i>       |  | <i>GBP1</i>     | <i>SPINK2</i>   | <i>CLGN</i>    | <i>NFKBIZ</i>    |  | <i>ZFP36</i>   |
| <i>JUNB</i>      |  | <i>GBP2</i>     | <i>SPRY1</i>    | <i>CLIC2</i>   | <i>NPC2</i>      |  | <i>ZNF90</i>   |
| <i>KCNAB2</i>    |  | <i>GSAP</i>     | <i>SQOR</i>     | <i>CLIP4</i>   | <i>NPDC1</i>     |  |                |
| <i>KLF10</i>     |  | <i>H1FX</i>     | <i>SRSF5</i>    | <i>COG3</i>    | <i>NPW</i>       |  |                |
| <i>KLF6</i>      |  | <i>HAGHL</i>    | <i>SRSF6</i>    | <i>CPT1A</i>   | <i>NR4A1</i>     |  |                |
| <i>LAT2</i>      |  | <i>HHIP-AS1</i> | <i>STK17B</i>   | <i>CRHBP</i>   | <i>NR4A2</i>     |  |                |
| <i>LINC01122</i> |  | <i>HLA-A</i>    | <i>SUN2</i>     | <i>CRYL1</i>   | <i>NUCB2</i>     |  |                |
| <i>LINC01637</i> |  | <i>HLA-B</i>    | <i>TAP1</i>     | <i>CST7</i>    | <i>OSBPL10</i>   |  |                |
| <i>LITAF</i>     |  | <i>HLA-C</i>    | <i>TESPA1</i>   | <i>CTSF</i>    | <i>OSM</i>       |  |                |
| <i>LKAAEAR1</i>  |  | <i>HLA-DMA</i>  | <i>TGFB1</i>    | <i>CTSW</i>    | <i>P4HTM</i>     |  |                |
| <i>LRCH4</i>     |  | <i>HLA-DMB</i>  | <i>THEMIS2</i>  | <i>CXCR4</i>   | <i>PARD6A</i>    |  |                |
| <i>MAP3K8</i>    |  | <i>HLA-DOA</i>  | <i>TIGD3</i>    | <i>CYTH1</i>   | <i>PARP10</i>    |  |                |
| <i>MAP4K1</i>    |  | <i>HLA-DPA1</i> | <i>TMEM107</i>  | <i>DACH1</i>   | <i>PER1</i>      |  |                |
| <i>MCL1</i>      |  | <i>HLA-DPB1</i> | <i>TMEM160</i>  | <i>DDO</i>     | <i>PHKG1</i>     |  |                |
| <i>MESP1</i>     |  | <i>HLA-DQA1</i> | <i>TMEM220</i>  | <i>DGCR6</i>   | <i>PIEZO1</i>    |  |                |
| <i>MGLL</i>      |  | <i>HLA-DQB1</i> | <i>TNFRSF21</i> | <i>DNAJC4</i>  | <i>PKN1</i>      |  |                |
| <i>MIF</i>       |  | <i>HLA-DRA</i>  | <i>TNFSF13B</i> | <i>DNTT</i>    | <i>PLXND1</i>    |  |                |
| <i>MRPL23</i>    |  | <i>HLA-DRB1</i> | <i>TNK2</i>     | <i>DUSP1</i>   | <i>PODXL2</i>    |  |                |
| <i>MSRB3</i>     |  | <i>HLA-E</i>    | <i>TOB1</i>     | <i>EDARADD</i> | <i>PPP1R15A</i>  |  |                |
| <i>MT-ND2</i>    |  | <i>HLA-F</i>    | <i>TP53I13</i>  | <i>EIF4E3</i>  | <i>PROM1</i>     |  |                |
| <i>MX1</i>       |  | <i>HOXA10</i>   | <i>TPD52</i>    | <i>ELANE</i>   | <i>PRR34-AS1</i> |  |                |
| <i>MYO5C</i>     |  | <i>HPCAL1</i>   | <i>TPGS1</i>    | <i>EMP1</i>    | <i>PRR7</i>      |  |                |
| <i>MZB1</i>      |  | <i>ID2</i>      | <i>TRIM8</i>    | <i>EPDR1</i>   | <i>PRRG4</i>     |  |                |
| <i>N4BP2L1</i>   |  | <i>IDS</i>      | <i>TSC22D3</i>  | <i>EREG</i>    | <i>PSMB8</i>     |  |                |
| <i>NAALADL1</i>  |  | <i>IER2</i>     | <i>TSPAN13</i>  | <i>FAAH</i>    | <i>PSMB8-AS1</i> |  |                |
| <i>NEAT1</i>     |  | <i>IFI44</i>    | <i>TTC32</i>    | <i>FAAP20</i>  | <i>PSMB9</i>     |  |                |
| <i>NEGR1</i>     |  | <i>IFI44L</i>   | <i>TTPAL</i>    | <i>FAM117A</i> | <i>PTGER2</i>    |  |                |
| <i>NFIA</i>      |  | <i>IGHD</i>     | <i>UBE2J1</i>   | <i>FAM30A</i>  | <i>PTGER4</i>    |  |                |
| <i>NFIC</i>      |  | <i>IGHM</i>     | <i>UBR5-AS1</i> | <i>FBXW5</i>   | <i>PTMS</i>      |  |                |
| <i>NFKBIZ</i>    |  | <i>IL17RC</i>   | <i>UCP2</i>     | <i>FCER1A</i>  | <i>PYROXD2</i>   |  |                |
| <i>NPC2</i>      |  | <i>IMPA2</i>    | <i>VAMP2</i>    | <i>FHL1</i>    | <i>RAB40B</i>    |  |                |
| <i>NPDC1</i>     |  | <i>ISG20</i>    | <i>VIM</i>      | <i>FKBP5</i>   | <i>RARRES3</i>   |  |                |
| <i>NPW</i>       |  | <i>ITM2C</i>    | <i>WAC-AS1</i>  | <i>FLNA</i>    | <i>RENBP</i>     |  |                |
| <i>NR1H2</i>     |  | <i>JAKMIP2</i>  | <i>YPEL3</i>    | <i>FLT3</i>    | <i>RGCC</i>      |  |                |
| <i>NR4A2</i>     |  | <i>JAM2</i>     | <i>ZBTB20</i>   | <i>FOS</i>     | <i>RGS1</i>      |  |                |

|               |  |             |              |                 |               |  |  |
|---------------|--|-------------|--------------|-----------------|---------------|--|--|
| <i>NT5M</i>   |  | <i>JUN</i>  | <i>ZFP36</i> | <i>FOSB</i>     | <i>RHPN1</i>  |  |  |
| <i>OSM</i>    |  | <i>JUNB</i> | <i>ZNF90</i> | <i>FRY</i>      | <i>RNASE2</i> |  |  |
| <i>PARD6A</i> |  | <i>JUND</i> |              | <i>GAS6-AS1</i> | <i>RNF130</i> |  |  |
